# Supplementary material for: Synthesis of Poly(styrene-acrylates-acrylic acid) Microspheres and Their Chemical Composition towards Colloidal Crystal Films
Source: Hindawi journal article supplement (doi:10.1155/2016/4527526), 2016-01-01
Supplement: f1 [file 4527526.f1.docx]

**Supporting Information**

**Synthesis of poly(styrene-acrylates-acrylic acid) microspheres and its chemical composition towards colloidal crystal films**

Luis A. Ríosa, Angel Licea-Claveriea, F. Paraguay-Delgadob, Norma A. Cortez-Lemusa*****

aCentro de Graduados e Investigación en Química, Instituto Tecnológico de Tijuana, A.P. 1166, Tijuana, B.C. 22000, México. [E-mail.ncortez@tectijuana.mx](mailto:E-mail.ncortez@tectijuana.mx).

bCentro de Investigación en Materiales Avanzados S. C. (CIMAV), Miguel de Cervantes 120, C.P. 31109 Chihuahua, Chih., México.


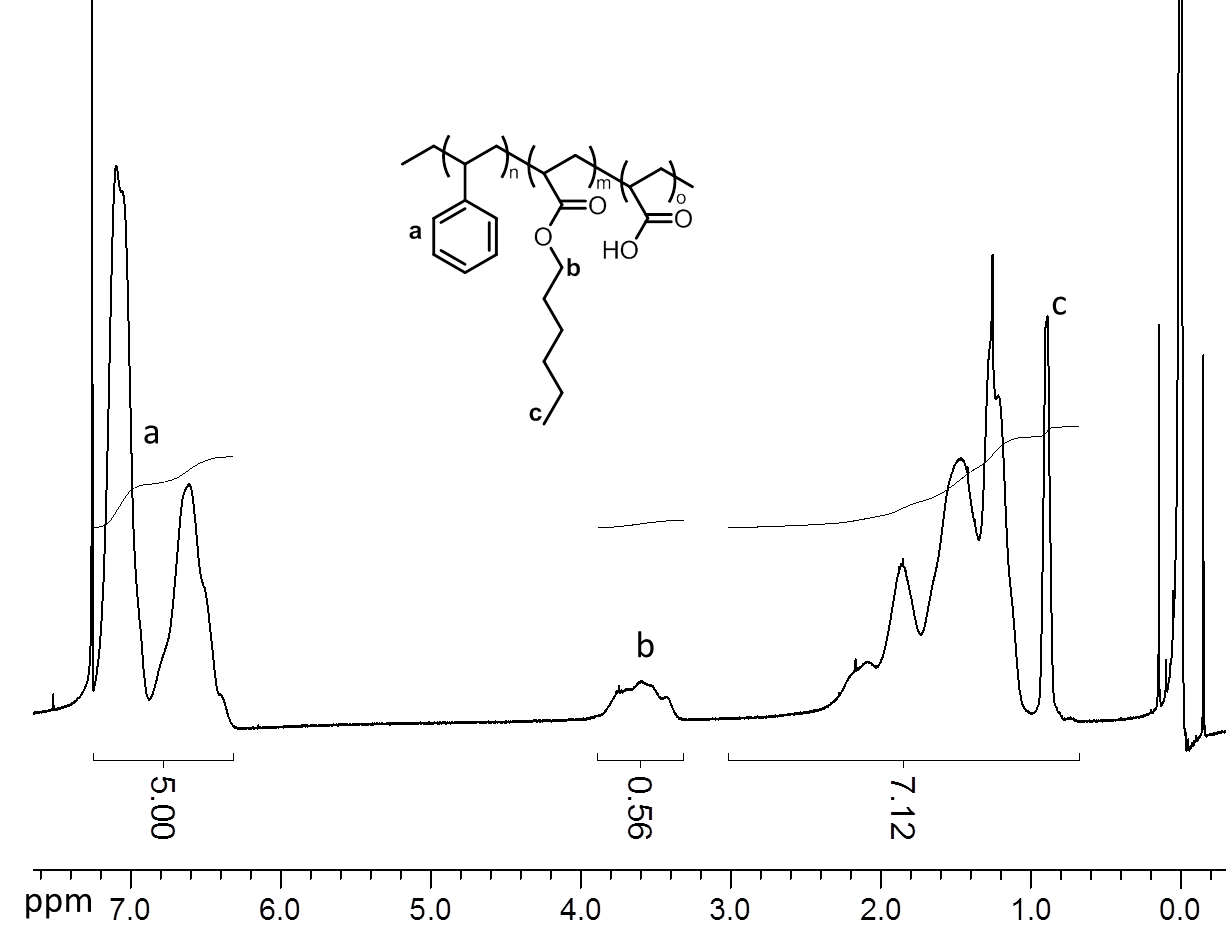


Fig. S1. A representative 1H NMR spectrum of Rx-56.


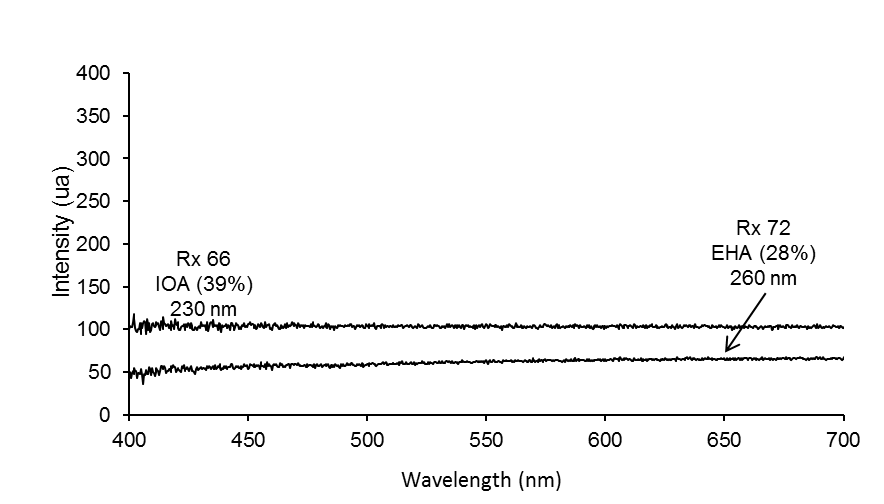


Fig. S2. Colloidal crystal films prepared with microspheres of Rx 66 and 72 exhibiting a lack of color.
